# Supplementary material for: Phylogenetic Diversity of Wetland Plants across China
Source: MDPI journal article supplement (doi:10.3390/plants10091850), 2021-09-06
Supplement: s1 [file s1]

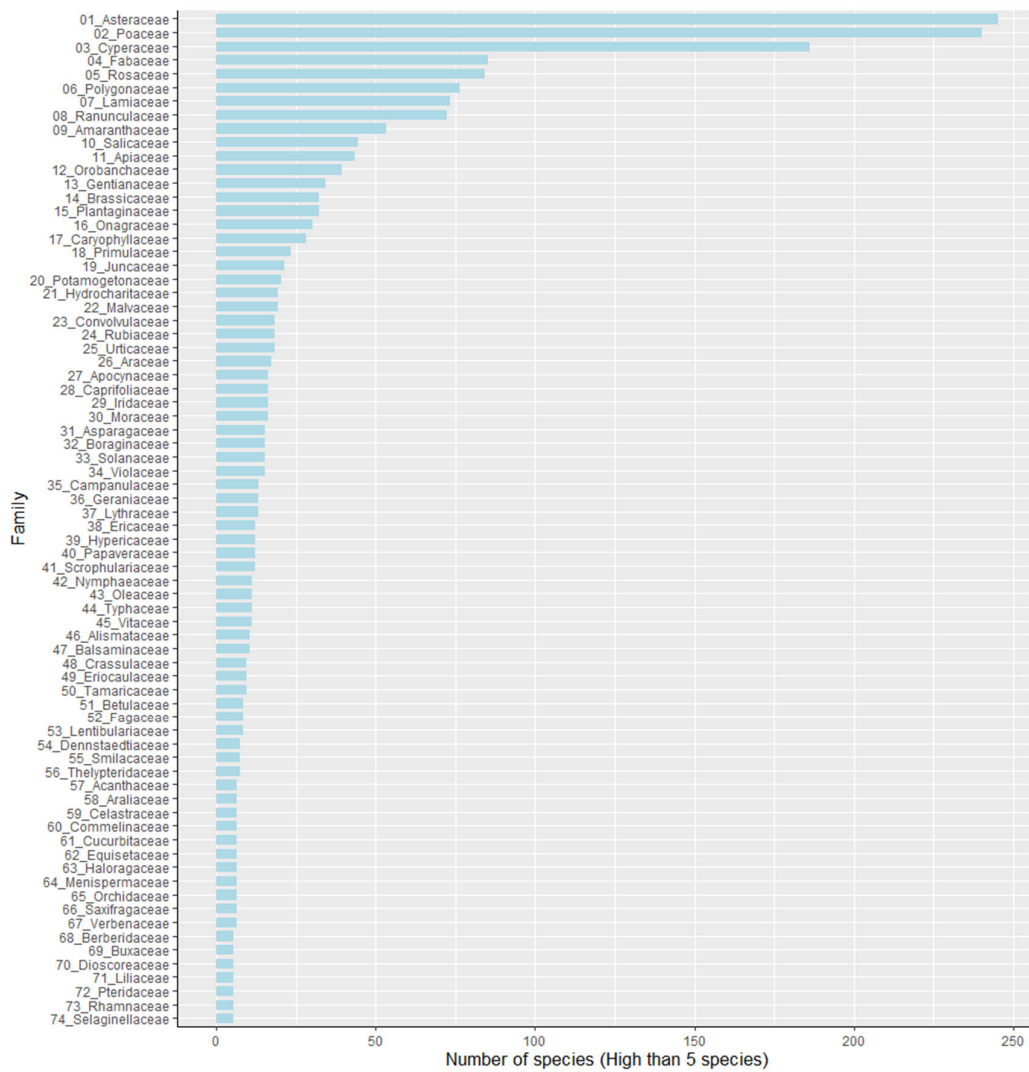

**Figure S1** Number of species in each family, which had more than 5 species.

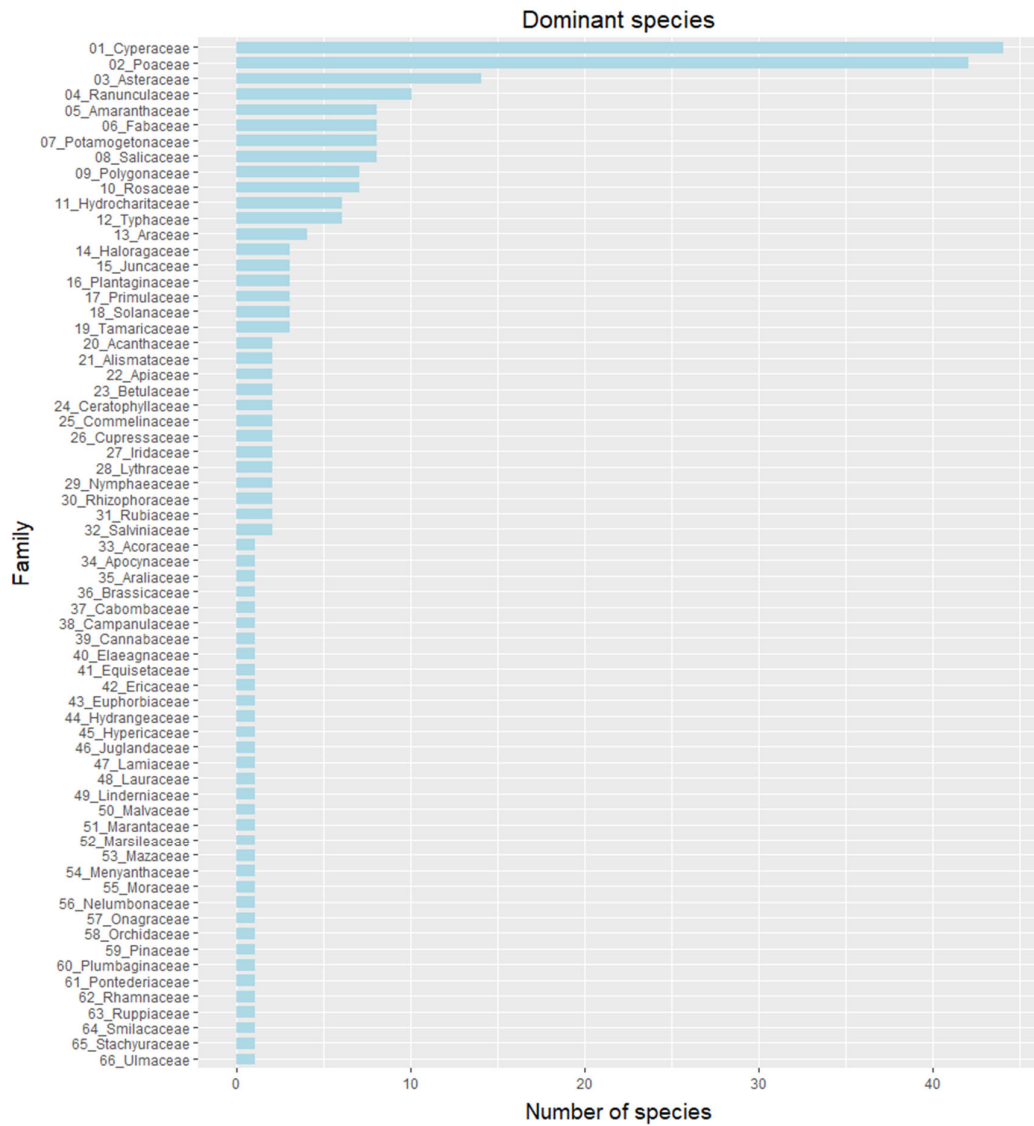

**Figure S2** Number of species in each family of dominant species.

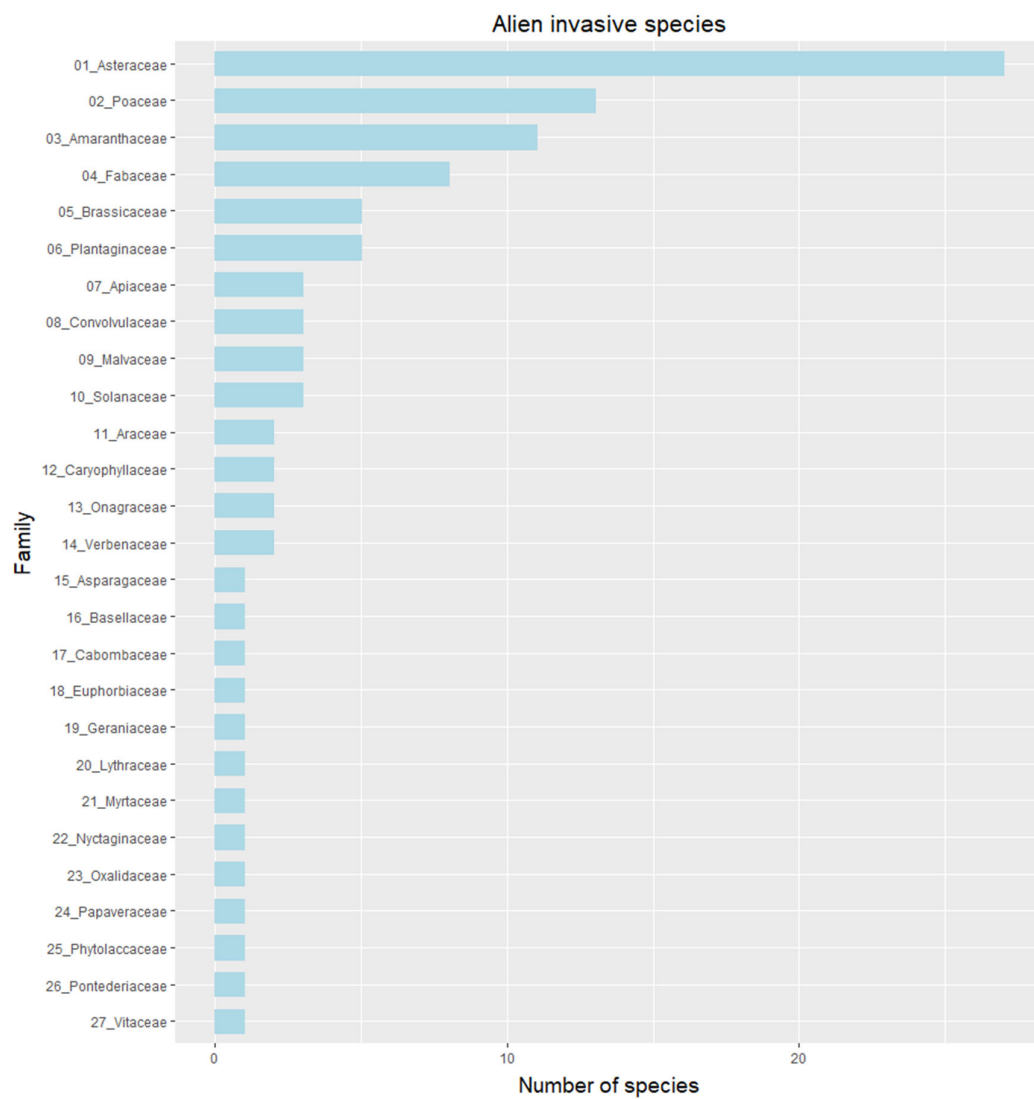

**Figure S3** Number of species in each family of alien invasive species.

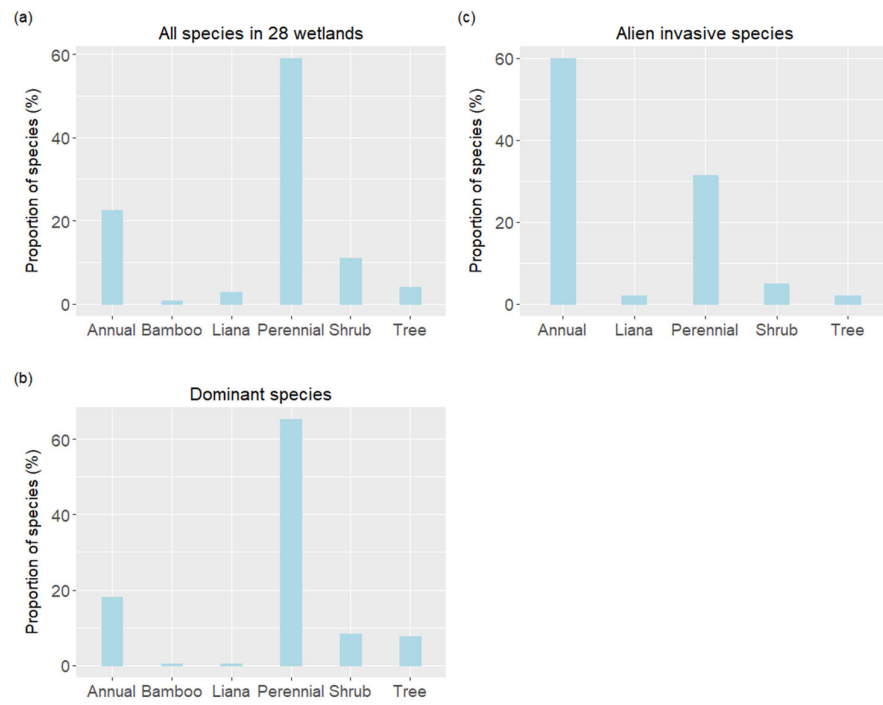

**Figure S4** Proportions of wetland plant species of different life forms in 28 wetlands.

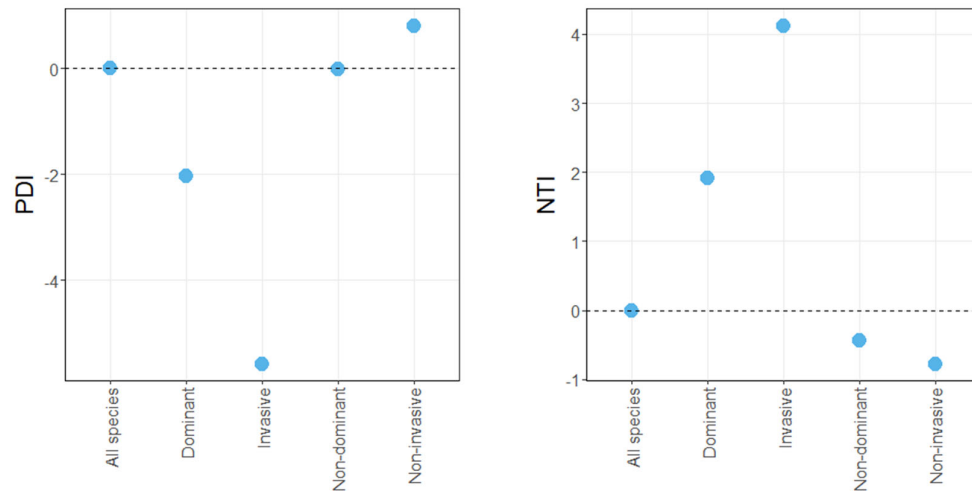

**Figure S5** Phylogenetic diversity indices of different species assemblages in 28 wetlands.

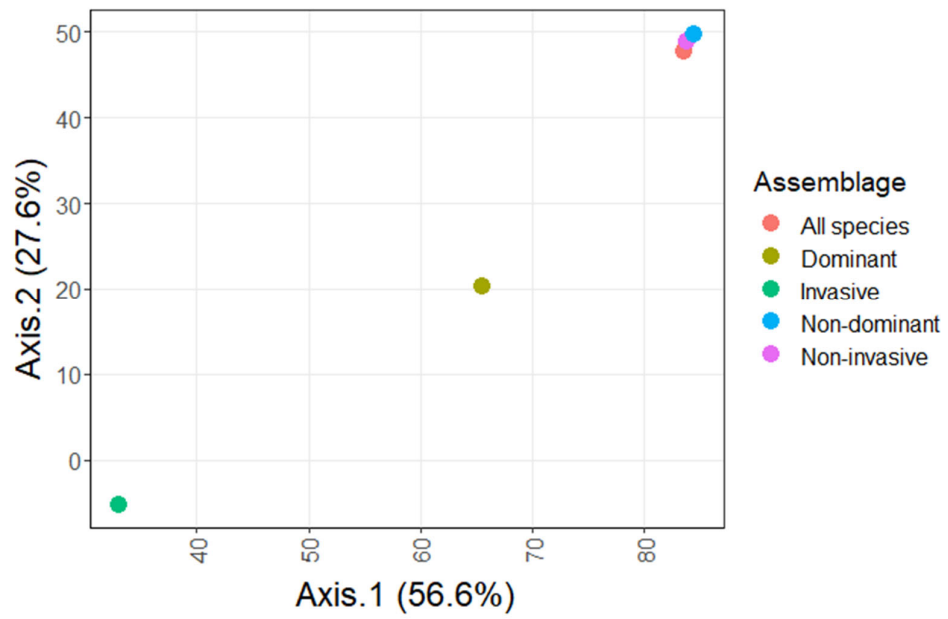

**Figure S6** The mean phylogenetic distance to the nearest taxon for each taxon (MNTD) among species assemblages, visualized by a Principal Coordinates Analysis (PCoA) ordination biplot.
